# Supplementary material for: Incentive-Compatible Revenue Management in Queueing Systems: Optimal Strategic Delay
Source: Atypon-hosted journal article supplement (doi:10.1287/msom.2013.0449), 2013-06-27
Supplement: msom.2013.0449-sm-ec.pdf [file msom.2013.0449-sm-ec.pdf]

## Online Supplement: Proofs

This document proves the propositions and states Lemmas 5-10. The proofs of Lemmas 3-10 are available upon request.

**Proof of Proposition 1.** By (18)-(19) the first-best revenue function  $\Pi^f$  satisfies

$$\begin{aligned}\Pi^f(\boldsymbol{\lambda}, \mu) &= \lambda_1 p_1^{c_1 \mu}(\lambda_1, \mu) + \lambda_2 p_2^{c_2 \mu}(\boldsymbol{\lambda}, \mu) = \sum_{i=1}^2 R_i(\lambda_i) - \frac{\lambda_1(c_1 - c_2)}{\mu - \lambda_1} - \frac{(\lambda_1 + \lambda_2)c_2}{\mu - \lambda_1 - \lambda_2}, \\ \Pi_{\lambda_1}^f(\boldsymbol{\lambda}, \mu) &= R_1'(\lambda_1) - \frac{(c_1 - c_2)\mu}{(\mu - \lambda_1)^2} - \frac{c_2\mu}{(\mu - \lambda_1 - \lambda_2)^2},\end{aligned}\quad (52)$$

$$\Pi_{\lambda_2}^f(\boldsymbol{\lambda}, \mu) = R_2'(\lambda_2) - \frac{c_2\mu}{(\mu - \lambda_1 - \lambda_2)^2}, \quad (53)$$

$$\Pi_{\lambda_1}^f(\boldsymbol{\lambda}, \mu) - \Pi_{\lambda_2}^f(\boldsymbol{\lambda}, \mu) = R_1'(\lambda_1) - \frac{(c_1 - c_2)\mu}{(\mu - \lambda_1)^2} - R_2'(\lambda_2). \quad (54)$$

$\Pi^f$  is strictly concave and submodular in  $\boldsymbol{\lambda}$ :  $\Pi_{\lambda_1\lambda_1}^f, \Pi_{\lambda_2\lambda_2}^f < \Pi_{\lambda_1\lambda_2}^f < 0$  by (52)-(54) and since  $R_i'' < 0$  by A2. Therefore  $\boldsymbol{\lambda}^f(\mu) = \arg \max_{\boldsymbol{\lambda} \in M(\mu)} \Pi^f(\boldsymbol{\lambda}, \mu)$  is unique:  $\Pi^f$  is strictly concave in  $\boldsymbol{\lambda}$  and  $M(\mu)$  is convex, bounded, and closed, except along  $\{\mathbf{0} \leq \boldsymbol{\lambda} \leq \boldsymbol{\Lambda} : \lambda_1 + \lambda_2 = \mu\}$  where  $\Pi^f(\boldsymbol{\lambda}, \mu) = -\infty$ .

Noting that  $\mu > \mu_0$  implies  $\Pi_{\lambda_i}^f(\mathbf{0}, \mu) = \bar{v}_i - c_i/\mu > 0$  for  $i = 1, 2$ , condition (i) is immediate from (20), which we prove next. Since  $R_i'(0) = v_i(0) = \bar{v}_i > R_i'(\lambda_i)$  for  $\lambda_i > 0$ , (52)-(53) yield:

$$\begin{aligned}\frac{\Pi_{\lambda_1}^f(\boldsymbol{\lambda}, \mu)}{c_1} - \frac{\Pi_{\lambda_2}^f(\boldsymbol{\lambda}, \mu)}{c_2} &= \frac{R_1'(\lambda_1)}{c_1} - \frac{\bar{v}_2}{c_2} < \frac{\bar{v}_1}{c_1} - \frac{\bar{v}_2}{c_2} \text{ if } \lambda_1 > 0 = \lambda_2, \\ \frac{\Pi_{\lambda_1}^f(\boldsymbol{\lambda}, \mu)}{c_1} - \frac{\Pi_{\lambda_2}^f(\boldsymbol{\lambda}, \mu)}{c_2} &= \frac{\bar{v}_1}{c_1} - \frac{R_2'(\lambda_2)}{c_2} - \left(1 - \frac{c_2}{c_1}\right) \left[\frac{1}{\mu} - \frac{\mu}{(\mu - \lambda_2)^2}\right] > \frac{\bar{v}_1}{c_1} - \frac{\bar{v}_2}{c_2} \text{ if } \lambda_1 = 0 < \lambda_2.\end{aligned}$$

Condition (ii) follows from (21), which holds by (54), and since  $\Pi_{\lambda_1\lambda_2}^f > \Pi_{\lambda_i\lambda_i}^f$  for  $i = 1, 2$ , implies that: if  $\Pi_{\lambda_i}^f(\mathbf{0}, \mu) > \Pi_{\lambda_j}^f(\mathbf{0}, \mu)$  then  $\Pi_{\lambda_i}^f(\boldsymbol{\lambda}, \mu) > \Pi_{\lambda_j}^f(\boldsymbol{\lambda}, \mu)$  for  $\lambda_i = 0 < \lambda_j$  and  $i \neq j$ .

*Part 1.* If  $\frac{\bar{v}_1}{c_1} = \frac{\bar{v}_2}{c_2}$  then  $\frac{1}{\mu_0} = \frac{\bar{v}_1}{c_1} = \frac{\bar{v}_2}{c_2}$ . Condition (i) implies  $\boldsymbol{\lambda}^f(\mu) > \mathbf{0}$  for  $\mu > \mu_0$ , so  $\mu^f = \mu_0$ .

*Part 2.* If  $\frac{\bar{v}_1}{c_1} > \frac{\bar{v}_2}{c_2}$ , then  $\frac{1}{\mu_0} = \frac{\bar{v}_2}{c_2} < \frac{\bar{v}_1}{c_1} < \frac{\bar{v}_1 - \bar{v}_2}{c_1 - c_2}$ . Condition (i) implies  $\lambda_1^f(\mu) > 0$  for  $\mu > \mu_0$ . We show  $\boldsymbol{\lambda}^f(\mu) > \mathbf{0} \Leftrightarrow \mu > \mu^f$  for  $\mu^f > \mu_0$ . Let  $\bar{\boldsymbol{\lambda}}(\mu) = (\bar{\lambda}_1(\mu), 0) \triangleq \arg \max_{\boldsymbol{\lambda} \in M(\mu), \lambda_2=0} \Pi^f(\boldsymbol{\lambda}, \mu)$  where  $\bar{\lambda}_1(\mu) > 0$  and  $\Pi_{\lambda_1}^f(\bar{\boldsymbol{\lambda}}(\mu), \mu) = 0$ . Since  $\Pi^f$  is strictly concave in  $\boldsymbol{\lambda}$  we have  $\lambda_2^f(\mu) > 0$  if and only if

$$\Pi_{\lambda_2}^f(\bar{\boldsymbol{\lambda}}(\mu), \mu) = \bar{v}_2 - \frac{c_2\mu}{(\mu - \bar{\lambda}_1(\mu))^2} > 0 = \Pi_{\lambda_1}^f(\bar{\boldsymbol{\lambda}}(\mu), \mu) = R_1'(\bar{\lambda}_1(\mu)) - \frac{c_1\mu}{(\mu - \bar{\lambda}_1(\mu))^2}. \quad (55)$$

Note that  $\Pi_{\lambda_2}^f(\bar{\boldsymbol{\lambda}}(\mu_0), \mu_0) < 0$  since  $\frac{1}{\mu_0} = \frac{\bar{v}_2}{c_2}$ . Since  $\Pi_{\lambda_1\lambda_1}^f < 0$  and  $\Pi_{\lambda_1\mu}^f > 0$ , (55) implies  $d\Pi_{\lambda_2}^f(\bar{\boldsymbol{\lambda}}(\mu), \mu)/d\mu > 0$  and  $\lim_{\mu \rightarrow \infty} \Pi_{\lambda_2}^f(\bar{\boldsymbol{\lambda}}(\mu), \mu) > 0$ . Hence there exists  $\mu^f \in (\mu_0, \infty)$  as claimed.

*Part 3.* A similar argument as in Part 2 shows  $\boldsymbol{\lambda}^f(\mu) > \mathbf{0} \Leftrightarrow \mu > \mu^f$  where  $\frac{1}{\mu^f} \in \left(\frac{\bar{v}_1 - \bar{v}_2}{c_1 - c_2}, \frac{\bar{v}_1}{c_1}\right)$ . ■

**Proof of Proposition 3.** *Part 1.* If strategic delay is optimal and  $\boldsymbol{\lambda}^s$  is the unique second-best demand vector, then  $\boldsymbol{\lambda}^s = \arg \max_{\boldsymbol{\lambda} \in M(\mu)} \Pi^s(\boldsymbol{\lambda}, \mu) \in M_2(\mu)$  by Definition 4. Since  $\Pi^s(\boldsymbol{\lambda}, \mu) = \Pi^{sd}(\boldsymbol{\lambda}, \mu)$  for  $\boldsymbol{\lambda} \in M_2(\mu)$  by (27), it follows that  $\boldsymbol{\lambda}^s = \arg \max_{\boldsymbol{\lambda} \in M_2(\mu)} \Pi^{sd}(\boldsymbol{\lambda}, \mu)$ . Since  $M_2(\mu) = \{\boldsymbol{\lambda} \in M(\mu) : \lambda_2 > 0, w_2^{c_2}(\boldsymbol{\lambda}, \mu) < \frac{v_1(\lambda_1) - v_2(\lambda_2)}{c_1 - c_2}\}$  by (24), every direction that is feasible at  $\boldsymbol{\lambda} \in$

$M_2(\mu)$  for  $M(\mu)$  is also feasible for  $M_2(\mu)$ , hence  $\lambda^s$  is a local maximum of  $\Pi^{sd}(\lambda, \mu)$  on  $M(\mu)$ . Since  $\Pi^{sd}(\lambda, \mu)$  is strictly concave in  $\lambda$  and  $M(\mu)$  is convex,  $\lambda^s = \arg \max_{\lambda \in M(\mu)} \Pi^{sd}(\lambda, \mu)$ .

If  $\lambda^s = \arg \max_{\lambda \in M(\mu)} \Pi^{sd}(\lambda, \mu) \in M_2(\mu)$ , then  $\Pi^s(\lambda^s, \mu) = \Pi^{sd}(\lambda^s, \mu) > \Pi^{sd}(\lambda, \mu)$  for  $\lambda^s \neq \lambda \in M(\mu)$ , and  $\Pi^s(\lambda^s, \mu) > \Pi^s(\lambda, \mu)$  for  $\lambda^s \neq \lambda \in M_2(\mu)$ . If  $\lambda \in M_1(\mu)$  then  $\Pi^s(\lambda, \mu) = 0 = \Pi^{sd}(\mathbf{0}, \mu) < \Pi^s(\lambda^s, \mu)$  since  $\lambda^s \neq \mathbf{0}$ . If  $\lambda \in M_0(\mu)$  then  $\lambda_2(w_2^{c\mu}(\lambda, \mu) - w_2^{sd}(\lambda, \mu)) \geq 0$ , so (27) implies  $\Pi^{sd}(\lambda^s, \mu) > \Pi^{sd}(\lambda, \mu) \geq \Pi^f(\lambda, \mu) = \Pi^s(\lambda, \mu)$ . Hence,  $\lambda^s = \arg \max_{\lambda \in M(\mu)} \Pi^s(\lambda, \mu)$ .

We next show that  $\lambda^s = \arg \max_{\lambda \in M(\mu)} \Pi^{sd}(\lambda, \mu) \in M_2(\mu)$  if and only if (29)-(32) hold for  $\lambda = \lambda^s$ . Suppose  $\lambda^s = \arg \max_{\lambda \in M(\mu)} \Pi^{sd}(\lambda, \mu) \in M_2(\mu)$ . The definition of  $M_2(\mu)$  implies (32),  $0 < \lambda_2^s \leq \Lambda_2$ , and  $0 \leq \lambda_1^s \leq \Lambda_1$ . We prove  $\lambda_2^s < \Lambda_2$  and  $0 < \lambda_1^s < \Lambda_1$ , which implies (29)-(30), i.e.,  $\Pi_{\lambda_1^s}^{sd}(\lambda^s, \mu) = \Pi_{\lambda_2^s}^{sd}(\lambda^s, \mu) = 0$ . That  $\lambda_2^s < \Lambda_2$  holds since  $v_2(\Lambda_2) = 0$  (by A1) and (30) imply that  $\Pi_{\lambda_2^s}^{sd}(\lambda, \mu) < 0$  if  $\lambda_2 = \Lambda_2$ . That  $\lambda_1^s > 0$  holds since  $\partial p_2^{sd}/\partial \lambda_1 > 0$  and  $\mu > \mu_0 \geq c_1/\bar{v}_1$  imply by (29) that  $\Pi_{\lambda_1^s}^{sd}(\lambda, \mu) > 0$  if  $\lambda_1 = 0$ . Since  $v_1' < 0$  and (32) implies  $v_1(\lambda_1^s) > 0$ , we have  $\lambda_1^s < \Lambda_1$  by A1.

Now suppose that (29)-(32) hold for  $\lambda = \lambda^s$ . Then (30) implies  $\lambda_2^s < \Lambda_2$  and (32) implies  $\lambda_1^s < \Lambda_1$  as shown above, so that  $\lambda^s \in M_2(\mu) \subset M(\mu)$ . Since  $\Pi^{sd}(\lambda, \mu)$  is strictly concave in  $\lambda$  and  $M(\mu)$  is convex, (29)-(30) imply  $\lambda^s = \arg \max_{\lambda \in M(\mu)} \Pi^{sd}(\lambda, \mu) \in M_2(\mu)$ .

*Part 2.* If strategic delay is optimal then by Part 1,  $\lambda^s \in M_2(\mu)$  and  $\Pi^s(\lambda^s, \mu) = \Pi^{sd}(\lambda^s, \mu) > \Pi^{sd}(\lambda, \mu)$  for  $\lambda \notin M_2(\mu)$ . That  $\lambda^f(\mu) \in M_2(\mu)$  follows from the definitions of  $M_i(\mu)$  in (22)-(24) and (27), which imply  $\Pi^f(\lambda^s, \mu) > \Pi^{sd}(\lambda^s, \mu)$  and  $\Pi^{sd}(\lambda, \mu) \geq \Pi^f(\lambda, \mu)$  for  $\lambda \notin M_2(\mu)$ . ■

**Proof of Proposition 4.** By Proposition 3, strategic delay is optimal and  $\lambda^s$  is the unique second-best vector if and only if  $\lambda = \lambda^s$  satisfies (29)-(32). Conditions (29)-(32) are equivalent to:

$$\frac{\bar{v}_2}{c_2} > \frac{v_1(\lambda_1)}{c_1} \text{ and } \lambda = \lambda^{sd}(\lambda_1), \quad (56)$$

$$\Pi_{\lambda_1}^{sd}(\lambda^{sd}(\lambda_1), \mu) = R_1'(\lambda_1) - \frac{c_1 \mu}{(\mu - \lambda_1)^2} + \Lambda_2 \cdot \bar{\lambda}_2^{sd}(\lambda_1) c_2 \frac{-v_1'(\lambda_1)}{c_1 - c_2} = 0, \quad (57)$$

$$w_2^{c\mu}(\lambda^{sd}(\lambda_1), \mu) = \frac{\mu}{(\mu - \lambda_1)(\mu - \lambda_1 - \Lambda_2 \cdot \bar{\lambda}_2^{sd}(\lambda_1))} < w_2^{sd}(\lambda^{sd}(\lambda_1)) = \frac{v_1(\lambda_1) - v_2(\lambda_2^{sd}(\lambda_1))}{c_1 - c_2}, \quad (58)$$

and  $\lambda_1 + \lambda_2^{sd}(\lambda_1) < \mu$ , where  $\bar{\lambda}_2^{sd}(\lambda_1) \triangleq \frac{\lambda_2^{sd}(\lambda_1)}{\Lambda_2}$  is constant in  $\Lambda_2 > 0$  (Lemma 3.4). The equivalence holds because: By Lemma 3.1,  $\lambda$  satisfies (30), and (31) for  $i = 2$ , if and only if (56) holds; condition (29) holds for  $\lambda = \lambda^{sd}(\lambda_1)$  if and only if (57) holds, which implies  $\lambda_1 > 0$  (since  $\mu > \mu_0$ ), so (31) holds for  $i = 1$ ; and for  $\lambda = \lambda^{sd}(\lambda_1)$ , (32) is identical to (58) and  $\lambda_1 + \lambda_2^{sd}(\lambda_1) < \mu$ .

We show that (56)-(58) are equivalent to the conditions in Parts 1-3 of the Proposition.

*Part 1.* If (37) does not hold, then no  $\lambda_1$  satisfies (56) and (57): By Lemma 3.1,  $\frac{\bar{v}_2}{c_2} \leq \frac{v_1(\lambda_1^\circ)}{c_1}$  implies  $\bar{\lambda}_2^{sd}(\lambda_1^\circ) = 0$ , so that  $\Pi_{\lambda_1}^{sd}(\lambda^{sd}(\lambda_1^\circ), \mu) = 0$  by (36) and (57). Since  $\Pi^{sd}(\lambda, \mu)$  is strictly concave in  $\lambda$  (by A3),  $\Pi_{\lambda_1}^{sd}(\lambda^{sd}(\lambda_1), \mu)$  strictly decreases in  $\lambda_1$ , so  $\Pi_{\lambda_1}^{sd}(\lambda^{sd}(\lambda_1), \mu) \neq 0$  if  $\lambda_1 \neq \lambda_1^\circ$ .

*Part 2.* If (38) does not hold, i.e.,  $w_2^{sd}(\lambda^{sd}(\lambda_1^\circ)) \leq \mu/(\mu - \lambda_1^\circ)^2$ , then no  $\lambda_1$  satisfies (57)-(58): For  $\lambda_1 < \lambda_1^\circ$  we have  $\Pi_{\lambda_1}^{sd}(\lambda^{sd}(\lambda_1), \mu) > 0$  since  $\Pi_{\lambda_1}^{sd}(\lambda^{sd}(\lambda_1^\circ), \mu) \geq 0$  by (57), and  $\Pi_{\lambda_1}^{sd}(\lambda^{sd}(\lambda_1), \mu)$  strictly decreases in  $\lambda_1$ . For  $\lambda_1 \geq \lambda_1^\circ$  we have  $w_2^{sd}(\lambda^{sd}(\lambda_1)) \leq w_2^{c\mu}(\lambda^{sd}(\lambda_1), \mu)$ , because  $\mu/(\mu - \lambda_1^\circ)^2 \leq w_2^{c\mu}(\lambda^{sd}(\lambda_1^\circ), \mu)$  and  $w_2^{sd}(\lambda^{sd}(\lambda_1)) - w_2^{c\mu}(\lambda^{sd}(\lambda_1), \mu)$  strictly decreases in  $\lambda_1$  by Lemma 3.3.

The equivalence (38)  $\Leftrightarrow \varepsilon_2(\lambda_2^{sd}(\lambda_1^\circ)) > \varepsilon_1(\lambda_1^\circ) \frac{c_2}{c_1 - c_2} + 1$  follows from (33) and (36).

*Part 3.* Suppose (37)-(38) hold. Write  $\Pi_{\lambda_1}^{sd}(\lambda^{sd}(\lambda_1), \mu; \Lambda_2)$  to express the dependence on  $\Lambda_2$ . Let  $\lambda_1(\Lambda_2)$  be the rate that satisfies (57) for a given  $\Lambda_2$ :  $\lambda_1(\Lambda_2) \triangleq \arg\{\lambda_1 \geq 0: \Pi_{\lambda_1}^{sd}(\lambda^{sd}(\lambda_1), \mu; \Lambda_2) = 0\}$ . We show that  $\lambda = \lambda^{sd}(\lambda_1(\Lambda_2))$  satisfies (56) and (58) if and only if  $\Lambda_2 < \bar{\Lambda}_2$  for some  $\bar{\Lambda}_2 \in (0, \infty)$ .

First, note that  $\lambda_1(\Lambda_2)$  is unique since  $\Pi_{\lambda_1}^{sd}(\boldsymbol{\lambda}^{sd}(\lambda_1), \mu; \Lambda_2)$  strictly decreases in  $\lambda_1$ , and  $\lambda_1(0) = \lambda_1^\circ$  since  $\Pi_{\lambda_1}^{sd}(\boldsymbol{\lambda}^{sd}(\lambda_1^\circ), \mu; 0) = 0$  by (36) and (57). Moreover,  $\lambda_1(\Lambda_2)$  is continuous and strictly increasing in  $\Lambda_2 \geq 0$ :  $\Pi_{\lambda_1}^{sd}(\boldsymbol{\lambda}^{sd}(\lambda_1), \mu; \Lambda_2)$  is continuous in  $(\lambda_1, \Lambda_2)$ , strictly decreasing in  $\lambda_1$ , and strictly increasing in  $\Lambda_2$  for  $\lambda_1 \geq \lambda_1^\circ$  since  $v'_1 < 0$  and  $\bar{\lambda}_2^{sd}(\lambda_1) > 0$  for  $\lambda_1 \geq \lambda_1^\circ$  (where  $\frac{\bar{v}_2}{c_2} > \frac{v_1(\lambda_1^\circ)}{c_1}$ ) by (37) implies  $\bar{\lambda}_2^{sd}(\lambda_1^\circ) > 0$  by Lemma 3.1, so that  $\bar{\lambda}_2^{sd}(\lambda_1) > 0$  for  $\lambda_1 \geq \lambda_1^\circ$  by Lemma 3.2).

Condition (56) holds for all  $\Lambda_2$  since  $\frac{\bar{v}_2}{c_2} > \frac{v_1(\lambda_1^\circ)}{c_1}$  by (37),  $\lambda_1(\Lambda_2) \geq \lambda_1^\circ$ , and  $v'_1 < 0$ .

By (38) it follows that condition (58) holds for all  $\Lambda_2$  such that

$$w_2^{c\mu}(\boldsymbol{\lambda}^{sd}(\lambda_1(\Lambda_2)), \mu) \approx \frac{\mu}{(\mu - \lambda_1^\circ)^2} \text{ and } w_2^{sd}(\boldsymbol{\lambda}^{sd}(\lambda_1(\Lambda_2))) \approx w_2^{sd}(\boldsymbol{\lambda}^{sd}(\lambda_1^\circ)). \quad (59)$$

The relationships in (59) hold for small enough  $\Lambda_2 > 0$ :  $w_2^{c\mu}(\boldsymbol{\lambda}, \mu)$  and  $w_2^{sd}(\boldsymbol{\lambda})$  are continuous in  $\boldsymbol{\lambda}$ , and by continuity of  $\lambda_1(\Lambda_2)$  and  $\lambda_2^{sd}(\lambda_1)$  we have  $\lambda_1(\Lambda_2) \approx \lambda_1(0) = \lambda_1^\circ$  and  $\bar{\lambda}_2^{sd}(\lambda_1(\Lambda_2)) \approx \bar{\lambda}_2^{sd}(\lambda_1^\circ)$  for small  $\Lambda_2$  where  $\bar{\lambda}_2^{sd}(\lambda_1^\circ)$  is constant in  $\Lambda_2 > 0$  (Lemma 3.4). Therefore, we have for small  $\Lambda_2$ :  $w_2^{sd}(\boldsymbol{\lambda}^{sd}(\lambda_1(\Lambda_2))) \approx w_2^{sd}(\boldsymbol{\lambda}^{sd}(\lambda_1^\circ))$  where  $w_2^{sd}(\boldsymbol{\lambda}^{sd}(\lambda_1^\circ))$  is independent of  $\Lambda_2 > 0$  (Lemma 3.4) and  $\Lambda_2 \cdot \bar{\lambda}_2^{sd}(\lambda_1(\Lambda_2)) \approx 0$  so  $w_2^{c\mu}(\boldsymbol{\lambda}^{sd}(\lambda_1(\Lambda_2)), \mu) \approx \frac{\mu}{(\mu - \lambda_1^\circ)^2}$  by (58).

The existence of  $\bar{\Lambda}_2 \in (0, \infty)$  holds by continuity and since  $w_2^{sd}(\boldsymbol{\lambda}^{sd}(\lambda_1(\Lambda_2))) - w_2^{c\mu}(\boldsymbol{\lambda}^{sd}(\lambda_1(\Lambda_2)), \mu)$  strictly decreases in  $\Lambda_2$ , which follows since  $\lambda_1(\Lambda_2) \geq \lambda_1^\circ$  is strictly increasing in  $\Lambda_2$ , and  $w_2^{sd}(\boldsymbol{\lambda}^{sd}(\lambda_1)) - w_2^{c\mu}(\boldsymbol{\lambda}^{sd}(\lambda_1), \mu)$  is strictly decreasing in  $\lambda_1$  (Lemma 3.3) and nonincreasing in  $\Lambda_2$  (Lemma 3.4). ■

**Lemma 5** *By Lemma 3,  $\lambda_2^{sd}(\lambda_1) = \arg \max_{\lambda_2 \in [0, \Lambda_2]} \lambda_2 p_2^{sd}(\boldsymbol{\lambda})$  and  $\boldsymbol{\lambda}^{sd}(\lambda_1) = (\lambda_1, \lambda_2^{sd}(\lambda_1))$ . Define*

$$\Pi_{\lambda_1}^{sd\infty}(\boldsymbol{\lambda}^{sd}(\lambda_1)) \triangleq \frac{1}{c_1} \left[ R'_1(\lambda_1) + \lambda_2^{sd}(\lambda_1) c_2 \frac{-v'_1(\lambda_1)}{c_1 - c_2} \right], \quad (60)$$

$$\lambda_1^{sd\infty} \triangleq \min\{\lambda_1 \geq 0 : \Pi_{\lambda_1}^{sd\infty}(\boldsymbol{\lambda}^{sd}(\lambda_1)) \leq 0\}, \text{ where } \lambda_1^{sd\infty} > 0, \quad (61)$$

$$\mu^*(\lambda_1) \triangleq \arg\{\mu > \lambda_1 : \Pi_{\lambda_1}^{sd}(\boldsymbol{\lambda}^{sd}(\lambda_1), \mu) = 0\} \text{ for } \lambda_1 \in [0, \lambda_1^{sd\infty}], \quad (62)$$

$$\bar{\lambda}_1^\infty \triangleq \min\{\lambda_1 \geq 0 : w_2^{sd}(\boldsymbol{\lambda}^{sd}(\lambda_1)) \leq 0\}, \quad (63)$$

$$\bar{w}_2^{c\mu}(\boldsymbol{\lambda}, \mu) \triangleq \begin{cases} \frac{\mu}{(\mu - \lambda_1)(\mu - \lambda_1 - \lambda_2)} \in [0, \infty), & \text{if } \mu > \lambda_1 + \lambda_2, \\ \infty, & \text{if } \mu \leq \lambda_1 + \lambda_2. \end{cases} \quad (64)$$

1. *Strategic delay is optimal at capacity  $\mu = \mu^*(\lambda_1)$  if and only if:*

(i)  $\lambda_1 \in (\underline{\lambda}_1, \lambda_1^{sd\infty}]$ , where  $\underline{\lambda}_1 = \min\{\lambda_1 \geq 0 : \frac{v_1(\lambda_1)}{c_1} \leq \frac{\bar{v}_2}{c_2}\}$ ; and

(ii)  $w_2^{sd}(\boldsymbol{\lambda}^{sd}(\lambda_1)) > \bar{w}_2^{c\mu}(\boldsymbol{\lambda}^{sd}(\lambda_1), \mu^*(\lambda_1))$ , where

$$\mu^*(\lambda_1) = \lambda_1 + \frac{1 + \sqrt{1 + 4\lambda_1 \cdot \Pi_{\lambda_1}^{sd\infty}(\boldsymbol{\lambda}^{sd}(\lambda_1))}}{2\Pi_{\lambda_1}^{sd\infty}(\boldsymbol{\lambda}^{sd}(\lambda_1))} \text{ and } \mu^{*'}(\lambda_1) > 0 \text{ for } \lambda_1 \in [0, \lambda_1^{sd\infty}]. \quad (65)$$

2. *If strategic delay optimality condition 1.(ii) holds then  $w_2^{sd}(\boldsymbol{\lambda}^{sd}(\lambda_1)) > \Pi_{\lambda_1}^{sd\infty}(\boldsymbol{\lambda}^{sd}(\lambda_1))$ .*

3. *If  $0 < \lambda_1 < \min(\lambda_1^{sd\infty}, \bar{\lambda}_1^\infty)$  then strategic delay optimality condition 1.(ii) satisfies:*

$$w_2^{sd}(\boldsymbol{\lambda}^{sd}(\lambda_1)) > \bar{w}_2^{c\mu}(\boldsymbol{\lambda}^{sd}(\lambda_1), \mu^*(\lambda_1)) \Leftrightarrow g^{c\mu}(\lambda_1) - g^{sd}(\lambda_1) > 0, \quad (66)$$

$$\text{where } g^{c\mu}(\lambda_1) \triangleq \frac{\Pi_{\lambda_1}^{sd\infty}(\boldsymbol{\lambda}^{sd}(\lambda_1))}{\bar{w}_2^{c\mu}(\boldsymbol{\lambda}^{sd}(\lambda_1), \mu^*(\lambda_1))} \text{ and } g^{sd}(\lambda_1) \triangleq \frac{\Pi_{\lambda_1}^{sd\infty}(\boldsymbol{\lambda}^{sd}(\lambda_1))}{w_2^{sd}(\boldsymbol{\lambda}^{sd}(\lambda_1))}. \quad (67)$$

**Lemma 6** Let  $\mu_e^{-1} \triangleq \frac{\bar{v}_1 - \bar{v}_2}{c_1 - c_2}$  and define the functions

$$k_1(\boldsymbol{\lambda}, \mu) \triangleq v_1(\lambda_1) - v_2(\lambda_2) - (c_1 - c_2) w_1^{c\mu}(\lambda_1, \mu), \quad (68)$$

$$k_2(\boldsymbol{\lambda}, \mu) \triangleq v_1(\lambda_1) - v_2(\lambda_2) - (c_1 - c_2) w_2^{c\mu}(\boldsymbol{\lambda}, \mu). \quad (69)$$

1.  $k_1(\mathbf{0}, \mu) = k_2(\mathbf{0}, \mu)$  and  $k_1(\boldsymbol{\lambda}, \mu) > k_2(\boldsymbol{\lambda}, \mu)$  if  $\boldsymbol{\lambda} \neq \mathbf{0}$ .
2.  $\partial k_1 / \partial \lambda_1 < 0 < \partial k_1 / \partial \lambda_2$ ,  $\partial k_2 / \partial \lambda_1 < 0$ , and  $\partial k_2 / \partial \lambda_1 < \partial k_2 / \partial \lambda_2$ .
3.  $k_i(\boldsymbol{\lambda}^f(\mu), \mu)$  is continuous in  $\mu$  for  $i = 1, 2$ .
4. If  $\lambda_1 = 0 = \lambda_2$  then  $\Pi_{\lambda_1}^f(\mathbf{0}, \mu) - \Pi_{\lambda_2}^f(\mathbf{0}, \mu) = k_i(\mathbf{0}, \mu) = (c_1 - c_2)(\mu_e^{-1} - \mu^{-1})$  for  $i = 1, 2$ .
5. If  $\lambda_1 = 0 < \lambda_2$  then  $\Pi_{\lambda_1}^f(\boldsymbol{\lambda}, \mu) - \Pi_{\lambda_2}^f(\boldsymbol{\lambda}, \mu) > k_i(\boldsymbol{\lambda}, \mu)$  for  $i = 1, 2$ .
6. If  $\lambda_1 > 0 = \lambda_2$  then  $\Pi_{\lambda_1}^f(\boldsymbol{\lambda}, \mu) - \Pi_{\lambda_2}^f(\boldsymbol{\lambda}, \mu) < k_i(\boldsymbol{\lambda}, \mu)$  for  $i = 1, 2$ .

**Lemma 7** Fix  $\mu > \mu_0$ .

1. If  $\frac{\bar{v}_1}{c_1} = \frac{\bar{v}_2}{c_2}$  then  $\frac{\bar{v}_1 - \bar{v}_2}{c_1 - c_2} = \frac{\bar{v}_1}{c_1} = \frac{\bar{v}_2}{c_2} = \frac{1}{\mu_0} = \frac{1}{\mu^f} = \frac{1}{\mu^s} \geq \frac{1}{\mu^{sd}}$ , and  $\boldsymbol{\lambda}^s(\mu) > \mathbf{0}$  for  $\mu > \mu^s$ .
2. If  $\frac{\bar{v}_1}{c_1} < \frac{\bar{v}_2}{c_2}$  then  $\frac{\bar{v}_2}{c_2} > \frac{\bar{v}_1}{c_1} = \frac{1}{\mu_0} > \frac{1}{\mu^f} > \frac{1}{\mu^s} \geq \frac{\bar{v}_1 - \bar{v}_2}{c_1 - c_2}$  and  $\boldsymbol{\lambda}^s(\mu) > \mathbf{0}$  if  $\frac{1}{\mu} < \frac{\bar{v}_1 - \bar{v}_2}{c_1 - c_2}$ .
  - (a) If  $\mu \leq \mu^f$ , the first-best is second-best and serves only type-2:  $\boldsymbol{\lambda}^s(\mu) = \boldsymbol{\lambda}^f(\mu) \in M_0(\mu)$  with  $\lambda_1^s(\mu) = 0 < \lambda_2^s(\mu)$ . If  $\mu \in (\mu^f, \mu^s)$ , then  $\boldsymbol{\lambda}^f(\mu) \in M_1(\mu)$  and  $\lambda_1^s(\mu) = 0 < \lambda_2^s(\mu)$ .
  - (b) If  $\mu^{sd} < \infty$ , then  $\mu^s < \mu^{sd}$ , and there is  $\mu' \in (\mu^s, \mu^{sd})$  such that  $\mathbf{0} < \boldsymbol{\lambda}^f(\mu') \in M_0(\mu')$ .
3. If  $\frac{\bar{v}_1}{c_1} > \frac{\bar{v}_2}{c_2}$  then  $\frac{\bar{v}_1 - \bar{v}_2}{c_1 - c_2} > \frac{\bar{v}_1}{c_1} > \frac{\bar{v}_2}{c_2} = \frac{1}{\mu_0} > \frac{1}{\mu^f} > \frac{1}{\mu^s}$ .
  - (a) If  $\mu \leq \mu^f$ , the first-best is second-best and serves only type-1:  $\boldsymbol{\lambda}^s(\mu) = \boldsymbol{\lambda}^f(\mu) \in M_0(\mu)$  with  $\lambda_1^s(\mu) > \lambda_2^s(\mu) = 0$ . If  $\mu \in (\mu^f, \mu^s)$ , then  $\boldsymbol{\lambda}^f(\mu) \in M_2(\mu)$ . If  $\mu > \mu^f$  then  $\lambda_1^s(\mu) > 0$ .
  - (b) If  $R'_1(\underline{\lambda}_1) > 0$ , where  $\underline{\lambda}_1 = \arg\{\lambda_1 \in [0, \Lambda_1] : \frac{v_1(\lambda_1)}{c_1} = \frac{\bar{v}_2}{c_2}\} \in (0, \Lambda_1)$ , then  $\boldsymbol{\lambda}^s(\mu) > \mathbf{0} \Leftrightarrow \mu > \mu^*(\underline{\lambda}_1)$  and
$$\mu^f < \mu^s = \mu^{sd} = \mu^*(\underline{\lambda}_1) = \underline{\lambda}_1 + \frac{1 + \sqrt{1 + 4\underline{\lambda}_1 \cdot R'_1(\underline{\lambda}_1) / c_1}}{2R'_1(\underline{\lambda}_1) / c_1}. \quad (70)$$
  - (c) If  $R'_1(\underline{\lambda}_1) \leq 0$ , then  $\lambda_2^s(\mu) = 0$  for all  $\mu$ , so that  $\mu^s = \mu^{sd} = \infty$ .

*Remark:* Let  $\bar{c} \triangleq c_1/c_2 > 1$ ,  $\bar{v} \triangleq \bar{v}_1/\bar{v}_2$ , and  $\bar{\Lambda} \triangleq \Lambda_1/\Lambda_2$ .

**Lemma 8** Let  $v_i(\lambda_i) = \bar{v}_i(1 - \frac{\lambda_i}{\Lambda_i})$ ,  $i=1, 2$ , and  $\bar{\Lambda} > \bar{v}/(4\bar{c}(\bar{c} - 1))$  (Assumption A4).

$$\underline{\lambda}_1 = \max(\Lambda_1(1 - \frac{\bar{c}}{\bar{v}}), 0) \text{ and } \lambda_2^{sd}(\lambda_1) = \frac{\Lambda_2}{2}(1 - \frac{\bar{v}}{\bar{c}}(1 - \frac{\lambda_1}{\Lambda_1})) \cdot I\{\lambda_1 \geq \underline{\lambda}_1\}. \quad (71)$$

1. The function  $\Pi_{\lambda_1}^{sd\infty}(\boldsymbol{\lambda}^{sd}(\lambda_1))$  is continuous, strictly decreasing in  $\lambda_1 \geq 0$ :

$$\Pi_{\lambda_1}^{sd\infty}(\boldsymbol{\lambda}^{sd}(\lambda_1)) = \frac{\bar{v}_1}{c_1} \left[ \left(1 - 2\frac{\lambda_1}{\Lambda_1}\right) + \lambda_2^{sd}(\lambda_1) \frac{\Lambda_1^{-1}}{\bar{c} - 1} \right] = \begin{cases} \frac{\bar{v}_1}{c_1}(1 - 2\frac{\lambda_1}{\Lambda_1}), & \lambda_1 < \underline{\lambda}_1, \\ \frac{\bar{v}_1}{c_1}(\alpha - \beta\lambda_1), & \lambda_1 \geq \underline{\lambda}_1, \end{cases} \quad (72)$$

where  $\alpha \triangleq 1 + (1 - \frac{\bar{v}}{\bar{c}}) \frac{\Lambda_2/\Lambda_1}{2(\bar{c}-1)}$ , and  $\beta \triangleq \frac{2}{\Lambda_1}(1 - \frac{\bar{v}\Lambda_2/\Lambda_1}{4\bar{c}(\bar{c}-1)}) > 0$ ,

$$\Pi_{\lambda_1}^{sd\infty}(\boldsymbol{\lambda}^{sd}(\underline{\lambda}_1)) = \begin{cases} \frac{\bar{v}_1}{c_1}\alpha > \frac{\bar{v}_1}{c_1} = \frac{R'_1(\underline{\lambda}_1)}{c_1} = \frac{v_1(\underline{\lambda}_1)}{c_1}, & \frac{\bar{v}}{\bar{c}} < 1 \text{ (so } \underline{\lambda}_1 = 0), \\ \frac{\bar{v}_1}{c_1}\alpha = \frac{\bar{v}_1}{c_1} = \frac{R'_1(\underline{\lambda}_1)}{c_1} = \frac{v_1(\underline{\lambda}_1)}{c_1}, & \frac{\bar{v}}{\bar{c}} = 1 \text{ (so } \underline{\lambda}_1 = 0), \\ \frac{\bar{v}_1}{c_1}(\alpha - \beta\underline{\lambda}_1) = \frac{\bar{v}_1}{c_1}(1 - 2\frac{\underline{\lambda}_1}{\Lambda_1}) = \frac{R'_1(\underline{\lambda}_1)}{c_1} < \frac{v_1(\underline{\lambda}_1)}{c_1}, & \frac{\bar{v}}{\bar{c}} > 1 \text{ (so } \underline{\lambda}_1 > 0), \end{cases} \quad (73)$$

and

$$\bar{v} < 2\bar{c} \Leftrightarrow \underline{\lambda}_1 < \lambda_1^{sd\infty} = \frac{\alpha}{\beta} = \Lambda_1 \left( \frac{1}{2} + \frac{\Lambda_2(\bar{c} - \bar{v}/2)}{4\Lambda_1\bar{c}(\bar{c} - 1) - \Lambda_2\bar{v}} \right) > \frac{\Lambda_1}{2}. \quad (74)$$

2. The function  $w_2^{sd}(\boldsymbol{\lambda}^{sd}(\lambda_1))$  is continuous, strictly decreasing in  $\lambda_1 \geq 0$ :

$$w_2^{sd}(\boldsymbol{\lambda}^{sd}(\lambda_1)) = \begin{cases} \frac{\bar{v}_1(1 - \lambda_1/\Lambda_1) - \bar{v}_2}{c_1 - c_2}, & \lambda_1 < \underline{\lambda}_1 \\ \frac{\bar{v}_1}{c_1}(\gamma - \delta\lambda_1), & \lambda_1 \geq \underline{\lambda}_1 \end{cases}, \quad \gamma \triangleq \frac{2\bar{c} - 1 - \bar{c}/\bar{v}}{2(\bar{c} - 1)}, \quad \delta \triangleq \frac{1}{\Lambda_1} \frac{2\bar{c} - 1}{2(\bar{c} - 1)} > 0, \quad (75)$$

$$w_2^{sd}(\boldsymbol{\lambda}^{sd}(\underline{\lambda}_1)) = \begin{cases} \frac{\bar{v}_1}{c_1}\gamma < \frac{v_1(\underline{\lambda}_1)}{c_1} = \frac{\bar{v}_1}{c_1} < \frac{v_2(\lambda_2^{sd}(\underline{\lambda}_1))}{c_2} < \frac{\bar{v}_2}{c_2}, & \frac{\bar{v}}{\bar{c}} < 1 \text{ (so } \underline{\lambda}_1 = 0), \\ \frac{\bar{v}_1}{c_1}\gamma = \frac{v_1(\underline{\lambda}_1)}{c_1} = \frac{\bar{v}_1}{c_1} = \frac{v_2(\lambda_2^{sd}(\underline{\lambda}_1))}{c_2} = \frac{\bar{v}_2}{c_2}, & \frac{\bar{v}}{\bar{c}} = 1 \text{ (so } \underline{\lambda}_1 = 0), \\ \frac{\bar{v}_1}{c_1}(\gamma - \delta\underline{\lambda}_1) = \frac{v_1(\underline{\lambda}_1)}{c_1} = \frac{v_2(\lambda_2^{sd}(\underline{\lambda}_1))}{c_2} = \frac{\bar{v}_2}{c_2} < \frac{\bar{v}_1}{c_1}, & \frac{\bar{v}}{\bar{c}} > 1 \text{ (so } \underline{\lambda}_1 > 0), \end{cases} \quad (76)$$

and

$$\bar{v} > \bar{c}/(2\bar{c} - 1) \Leftrightarrow \underline{\lambda}_1 < \bar{\lambda}_1^\infty = \frac{\gamma}{\delta} = \Lambda_1 \left( 1 - \frac{\bar{c}/\bar{v}}{2\bar{c} - 1} \right), \quad (77)$$

$$\bar{v} \leq \bar{c}/(2\bar{c} - 1) \Rightarrow \bar{\lambda}_1^\infty = 0. \quad (78)$$

**Lemma 9** Let  $v_i(\lambda_i) = \bar{v}_i(1 - \frac{\lambda_i}{\Lambda_i})$ ,  $i=1, 2$ , with  $\bar{\Lambda} > \bar{v}/(4\bar{c}(\bar{c} - 1))$  (Assumption A4) and  $\bar{v} < 2\bar{c}$ .

1. Let  $\bar{\Lambda}_2 \triangleq 2\Lambda_1(\bar{c} - \frac{1}{2} - \frac{\bar{c}}{\bar{v}})$ . Then  $\Lambda_2 < \bar{\Lambda}_2 \Rightarrow \lambda_1^{sd\infty} < \bar{\lambda}_1^\infty$ ,  $\Lambda_2 = \bar{\Lambda}_2 \Rightarrow \lambda_1^{sd\infty} = \bar{\lambda}_1^\infty$ , and  $\Lambda_2 > \bar{\Lambda}_2 \Rightarrow \lambda_1^{sd\infty} > \bar{\lambda}_1^\infty$ .
2. If  $\bar{c}/(2\bar{c} - 1) < \bar{v} < 2\bar{c}$ , then  $g^{sd}(\underline{\lambda}_1) > 0$ . Furthermore:

$$g^{sd}(\lambda_1) = \frac{\Pi_{\lambda_1}^{sd\infty}(\boldsymbol{\lambda}^{sd}(\lambda_1))}{w_2^{sd}(\boldsymbol{\lambda}^{sd}(\lambda_1))} = \frac{\alpha - \beta\lambda_1}{\gamma - \delta\lambda_1} = \frac{\beta}{\delta} \frac{\lambda_1^{sd\infty} - \lambda_1}{\bar{\lambda}_1^\infty - \lambda_1} \text{ for } \lambda_1 \geq \underline{\lambda}_1. \quad (79)$$

- (a) If  $\lambda_1^{sd\infty} < \bar{\lambda}_1^\infty$  then  $g^{sd}(\lambda_1^{sd\infty}) = 0$ ,  $g^{sd} < 0$  and  $g^{sd} < 0$  on  $[\underline{\lambda}_1, \lambda_1^{sd\infty}]$ .
- (b) If  $\lambda_1^{sd\infty} = \bar{\lambda}_1^\infty$  then  $g^{sd} = \frac{\alpha}{\gamma} = \frac{\beta}{\delta} > 0$  on  $[\underline{\lambda}_1, \lambda_1^{sd\infty}]$ .
- (c) If  $\lambda_1^{sd\infty} > \bar{\lambda}_1^\infty$  then  $g^{sd} > 0$ ,  $g^{sd} > 0$ , and  $g^{sd} > 0$  on  $[\underline{\lambda}_1, \bar{\lambda}_1^\infty]$ .

3. If  $\bar{v} > \bar{c}$  then  $g^{sd}(\underline{\lambda}_1)$  is constant in  $\Lambda_2$ , and  $g^{sd}(\lambda_1)$  increases in  $\Lambda_2$  for fixed  $\lambda_1 \in (\underline{\lambda}_1, \bar{\lambda}_1^\infty)$ .

**Lemma 10** Let  $v_i(\lambda_i) = \bar{v}_i(1 - \frac{\lambda_i}{\Lambda_i})$ ,  $i=1, 2$ , with  $\bar{\Lambda} > \bar{v}/(4\bar{c}(\bar{c} - 1))$  (Assumption A4) and  $\bar{v} < 2\bar{c}$ .

$$g_1^{c\mu}(\lambda_1) \triangleq 1 - \frac{\lambda_2^{sd}(\lambda_1) - \lambda_2^{sd}(\underline{\lambda}_1)}{\mu^*(\lambda_1) - \lambda_1} \text{ and } g_2^{c\mu}(\lambda_1) \triangleq -\frac{\lambda_2^{sd}(\lambda_1)}{\mu^*(\lambda_1) - \lambda_1}, \quad \lambda_1 \in [0, \lambda_1^{sd\infty}]. \quad (80)$$

1.  $g^{c\mu} \leq 1$  on  $[0, \lambda_1^{sd\infty}]$ ;  $g^{c\mu} < 1$  on  $(\underline{\lambda}_1, \lambda_1^{sd\infty})$ ; and  $g^{c\mu}(\lambda_1^{sd\infty}) = 1$ , where

$$g^{c\mu}(\lambda_1) = \max \left( 0, 1 - \frac{\lambda_2^{sd}(\lambda_1)}{\mu^*(\lambda_1) - \lambda_1} \right) = \max(0, g_1^{c\mu}(\lambda_1) + g_2^{c\mu}(\lambda_1)), \quad \lambda_1 \in [0, \lambda_1^{sd\infty}]. \quad (81)$$

2. (a)  $g_1^{c\mu} \leq 1$  on  $[\underline{\lambda}_1, \lambda_1^{sd\infty}]$ , and  $g_1^{c\mu}(\underline{\lambda}_1) = g_1^{c\mu}(\lambda_1^{sd\infty}) = 1$ , where

$$g_1^{c\mu}(\lambda_1) = 1 - \frac{\bar{v}}{2\bar{c}\bar{\Lambda}} \frac{(\lambda_1 - \underline{\lambda}_1)}{\mu^*(\lambda_1) - \lambda_1} = 1 - \frac{\bar{v}}{\bar{c}\bar{\Lambda}} \frac{(\lambda_1 - \underline{\lambda}_1) \frac{\bar{v}_1}{c_1}(\alpha - \beta\lambda_1)}{1 + \sqrt{1 + 4\lambda_1 \cdot \frac{\bar{v}_1}{c_1}(\alpha - \beta\lambda_1)}}, \quad \lambda_1 \in [\underline{\lambda}_1, \lambda_1^{sd\infty}]. \quad (82)$$

- (b) As  $\Lambda_2 \rightarrow 0$ ,  $g_1^{c\mu} \rightarrow 1$  on  $[\underline{\lambda}_1, \lambda_1^{sd\infty}]$ . Moreover,  $g_1^{c\mu} > 0$  on  $[\underline{\lambda}_1, \lambda_1^{sd\infty}]$ .
- (c) For fixed  $\lambda_1 \in (\underline{\lambda}_1, \lambda_1^{sd\infty}]$  the function  $g_1^{c\mu}(\lambda_1)$  strictly decreases in  $\Lambda_2$ .

3. (a) If  $\bar{v} < \bar{c}$  then  $g_2^{c\mu} < 0$  on  $[0, \lambda_1^{sd\infty})$ ,  $g_2^{c\mu}(\lambda_1^{sd\infty}) = 0$ , and  $g_2^{c\mu} > 0$  on  $[\lambda_1^{sd\infty}, \infty)$ .  
(b) If  $\bar{v} \geq \bar{c}$  then  $g_2^{c\mu} = 0$  on  $[0, \lambda_1^{sd\infty}]$ .

**Proof of Proposition 5.** *Part 1.* These claims are proved in Lemma 7.1.

*Part 2.* Let  $v_i(\lambda_i) = \bar{v}_i(1 - \frac{\lambda_i}{\bar{\Lambda}_i})$ ,  $i=1, 2$ , with  $\bar{\Lambda} > \bar{v}/(4\bar{c}(\bar{c}-1))$  (Assumption A4) and  $\bar{v} = \bar{c}$ . By (71) we have  $\underline{\lambda}_1 = 0 = \lambda_2^{sd}(\underline{\lambda}_1)$  for  $\bar{v} = \bar{c}$ . From (73) and (76)

$$\Pi_{\lambda_1}^{sd\infty}(\boldsymbol{\lambda}^{sd}(0)) = \frac{\bar{v}_1}{c_1} = w_2^{sd}(\boldsymbol{\lambda}^{sd}(0)) \text{ and } g^{sd}(0) = 1. \quad (83)$$

If  $\Lambda_2 \geq \Lambda_1 2(\bar{c} - 1.5)$ , then  $\Lambda_2 \geq \bar{\Lambda}_2$  and  $\lambda_1^{sd\infty} \geq \bar{\lambda}_1^\infty$  by Lemma 9.1. Therefore  $\Pi_{\lambda_1}^{sd\infty}(\boldsymbol{\lambda}^{sd}(\bar{\lambda}_1^\infty)) \geq 0 = w_2^{sd}(\boldsymbol{\lambda}^{sd}(\bar{\lambda}_1^\infty))$ , since  $\lambda_1^{sd\infty} = \min\{\lambda_1 \geq 0 : \Pi_{\lambda_1}^{sd\infty}(\boldsymbol{\lambda}^{sd}(\lambda_1)) \leq 0\}$  by (61) and  $\bar{\lambda}_1^\infty = \min\{\lambda_1 \geq 0 : w_2^{sd}(\boldsymbol{\lambda}^{sd}(\lambda_1)) \leq 0\}$  by (63). Combined with (83), and since  $\Pi_{\lambda_1}^{sd\infty}(\boldsymbol{\lambda}^{sd}(\lambda_1))$  and  $w_2^{sd}(\boldsymbol{\lambda}^{sd}(\lambda_1))$  are linearly decreasing, it follows that  $\Pi_{\lambda_1}^{sd\infty}(\boldsymbol{\lambda}^{sd}(\lambda_1)) \geq w_2^{sd}(\boldsymbol{\lambda}^{sd}(\lambda_1))$  on  $[0, \lambda_1^{sd\infty}]$ . By Lemma 5.2 strategic delay cannot be optimal at any capacity level.

If  $\Lambda_2 < \Lambda_1 2(\bar{c} - 1.5)$  then  $\Lambda_2 < \bar{\Lambda}_2$  and  $\lambda_1^{sd\infty} < \bar{\lambda}_1^\infty$  by Lemma 9.1. Hence,  $w_2^{sd}(\boldsymbol{\lambda}^{sd}(\lambda_1^{sd\infty})) > \Pi_{\lambda_1}^{sd\infty}(\boldsymbol{\lambda}^{sd}(\lambda_1^{sd\infty})) = 0 = \bar{w}_2^{c\mu}(\boldsymbol{\lambda}^{sd}(\lambda_1^{sd\infty}), \mu^*(\lambda_1^{sd\infty}))$ , where the last equality follows since  $\mu^*(\lambda_1^{sd\infty}) = \infty$  by (65). This implies by Lemma 5.1 that strategic delay is optimal for  $\mu = \infty$ . Next, we prove there is a unique  $\underline{x} \in [0, \lambda_1^{sd\infty})$  with  $g^{c\mu}(\underline{x}) - g^{sd}(\underline{x}) \leq 0$  for  $x \in [0, \underline{x}]$  and  $g^{c\mu}(x) - g^{sd}(x) > 0$  for  $x \in (\underline{x}, \lambda_1^{sd\infty}]$ , which implies by Lemma 5.1 and 5.3, and since  $\mu^{*'} > 0$  by (65), that strategic delay is optimal if and only if  $\mu > \mu^{sd} = \mu^*(\underline{x})$ .

We have  $g^{c\mu} = \max(0, g_1^{c\mu})$  by Lemma 10.1, since  $g_2^{c\mu} = 0$  by Lemma 10.3.(b) for  $\bar{v} = \bar{c}$ . Note

$$g^{c\mu}(0) - g^{sd}(0) = 0, \text{ and } g^{c\mu}(\lambda_1^{sd\infty}) - g^{sd}(\lambda_1^{sd\infty}) = 1. \quad (84)$$

The first equality holds since  $g^{sd}(0) = 1$  by (83), and  $g^{c\mu}(0) = 1$  because  $g_1^{c\mu}(\underline{\lambda}_1) = 1$  by Lemma 10.2.(a) and  $\underline{\lambda}_1 = 0$ . The second equality holds since  $g^{sd}(\lambda_1^{sd\infty}) = 0$  by Lemma 9.2.(a) and  $g_1^{c\mu}(\lambda_1^{sd\infty}) = 1$  by Lemma 10.2.(a). Since  $g^{sd} \geq 0$  on  $[0, \lambda_1^{sd\infty}]$  by Lemma 9.2.(a), we have  $g^{c\mu}(x) - g^{sd}(x) > 0 \Leftrightarrow g_1^{c\mu}(x) - g^{sd}(x) > 0$ . Given (84), and since  $g_1^{c\mu} - g^{sd} > 0$  (Lemma 9.2.(a) and Lemma 10.2.(b)), we have two cases. (i) if  $g_1^{c\mu}(0) \geq g^{sd}(0)$  then  $\underline{x} = 0$ , and  $\mu^*(0) = \frac{c_1}{\bar{v}_1} = \mu_0$  by (65) and (83). That  $g_1^{c\mu}(0) - g^{sd}(0) \geq 0 \Leftrightarrow \frac{\Lambda_2}{\Lambda_1} \leq \frac{2(\bar{c}-1.5)}{1+\bar{v}_1/c_1\Lambda_1(\bar{c}-1)}$  follows since  $g^{sd}(0) = \frac{1}{2\bar{\Lambda}} \frac{1-2(\bar{c}-1.5)\bar{\Lambda}}{\Lambda_1(\bar{c}-1)}$  by (79) and  $g_1^{c\mu}(0) = -\frac{1}{2\bar{\Lambda}} \frac{\bar{v}_1}{c_1}$  by (82) (for  $g^{sd}(0)$  note that  $\bar{v} = \bar{c}$  implies  $\alpha = 1$  by (72),  $\lambda_1^{sd\infty} = 1/\beta$  by (74),  $\gamma = 1$  by (75), and  $\bar{\lambda}_1^\infty = 1/\delta$  by (77); for  $g_1^{c\mu}(0)$  use  $\alpha = 1$  and  $\underline{\lambda}_1 = 0$ ). (ii) if  $g_1^{c\mu}(0) < g^{sd}(0)$  then  $\underline{x} \in (0, \lambda_1^{sd\infty})$  and  $\mu^*(\underline{x}) > \mu^*(0) = \mu_0$  since  $\mu^{*'} > 0$ . ■

**Proof of Proposition 6.** *Part 1.* These claims are proved in Lemma 7.2.

*Part 2.* Let  $v_i(\lambda_i) = \bar{v}_i(1 - \frac{\lambda_i}{\bar{\Lambda}_i})$ ,  $i=1, 2$ , with  $\bar{\Lambda} > \bar{v}/(4\bar{c}(\bar{c}-1))$  (Assumption A4) and  $\bar{v} < \bar{c}$ . By (71) we have  $\underline{\lambda}_1 = 0$  and  $\lambda_2^{sd}(\underline{\lambda}_1) = \frac{\Lambda_2}{2}(1 - \frac{\bar{v}}{\bar{c}}) > 0$  for  $\bar{v} < \bar{c}$ . From (73) and (76)

$$\Pi_{\lambda_1}^{sd\infty}(\boldsymbol{\lambda}^{sd}(0)) > \frac{\bar{v}_1}{c_1} > w_2^{sd}(\boldsymbol{\lambda}^{sd}(0)). \quad (85)$$

If  $\bar{c}/(\bar{c}-1/2) \geq \bar{v}$  or  $\Lambda_2 \geq 2\Lambda_1(\bar{c} - \frac{1}{2} - \frac{\bar{v}}{\bar{c}})$ , then  $\Lambda_2 \geq \bar{\Lambda}_2$  and  $\lambda_1^{sd\infty} \geq \bar{\lambda}_1^\infty$  by Lemma 9.1. By same line of argument as in the proof of Prop. 5, strategic delay cannot be optimal at any capacity.

If  $\bar{c} > \bar{v} > \bar{c}/(\bar{c}-1/2)$  and  $\Lambda_2 < 2\Lambda_1(\bar{c} - \frac{1}{2} - \frac{\bar{v}}{\bar{c}})$  then  $\lambda_1^{sd\infty} < \bar{\lambda}_1^\infty$  by Lemma 9.1, so that strategic delay is optimal for  $\mu = \infty$  by same line of argument as in the proof of Prop. 5. Next, we prove that there exists a unique  $\underline{z} \in (0, \lambda_1^{sd\infty})$  with  $g^{c\mu}(\underline{z}) = g^{sd}(\underline{z})$  and  $g^{c\mu}(z) - g^{sd}(z) > 0$  for  $z \in (\underline{z}, \lambda_1^{sd\infty}]$ , which implies by Lemma 5.1 and 5.3, and since  $\mu^{*'} > 0$  by (65), that strategic delay is optimal if and only if  $\mu > \mu^{sd} = \mu^*(\underline{z})$ .

That there exists  $\underline{z} \in (0, \lambda_1^{sd\infty})$  with  $g^{c\mu}(\underline{z}) = g^{sd}(\underline{z})$  follows since  $g^{c\mu} - g^{sd}$  is continuous,

$$g^{c\mu}(0) - g^{sd}(0) < 0, \text{ and } g^{c\mu}(\lambda_1^{sd\infty}) - g^{sd}(\lambda_1^{sd\infty}) = 1. \quad (86)$$

The inequality in (86) holds since  $g^{c\mu} = \max(0, g_1^{c\mu} + g_2^{c\mu})$ ,  $g_1^{c\mu}(0) = 1$ , and  $g_2^{c\mu}(0) < 0$  (Parts 1, 2.(a), and 3.(a) of Lemma 10, respectively, since  $\underline{\lambda}_1 = 0 < \lambda_1^{sd\infty}$ ), and because  $g^{sd}(0) > 1$  (by (85), and since  $w_2^{sd}(\boldsymbol{\lambda}^{sd}(0)) > 0$  for  $\bar{v} > \bar{c}/(\bar{c} - 1/2)$  by (75)). The equality in (86) holds since  $g^{c\mu}(\lambda_1^{sd\infty}) = 1$  by Lemma 10.1, and  $g^{sd}(\lambda_1^{sd\infty}) = 0$  for  $\lambda_1^{sd\infty} < \bar{\lambda}_1^\infty$  by Lemma 9.2.(a).

Next, we prove the claim:  $g^{c\mu}(z) - g^{sd}(z) > 0$  for  $z \in (\underline{z}, \lambda_1^{sd\infty}]$ . Since  $g^{sd} \geq 0$  on  $[0, \lambda_1^{sd\infty}]$  by Lemma 9.2.(a), and  $g^{c\mu} = \max(0, g_1^{c\mu} + g_2^{c\mu})$ , it follows that  $g^{c\mu}(z) - g^{sd}(z) > 0 \Leftrightarrow g_1^{c\mu}(z) + g_2^{c\mu}(z) - g^{sd}(z) > 0$ , and  $g_1^{c\mu}(\underline{z}) + g_2^{c\mu}(\underline{z}) - g^{sd}(\underline{z}) = 0$ . Since  $g_2^{c\mu} > 0$  by Lemma 10.3.(a), the claim holds if  $g_1^{c\mu}(z) - g^{sd}(z) > g_1^{c\mu}(\underline{z}) - g^{sd}(\underline{z})$  for  $z \in (\underline{z}, \lambda_1^{sd\infty}]$ . This holds since  $g_1^{c\mu} - g^{sd}$  is strictly convex ( $g^{sd\prime\prime} < 0$  by Lemma 9.2.(a),  $g_1^{c\mu\prime\prime} > 0$  by Lemma 10.2.(b)), and moreover

$$g_1^{c\mu}(0) - g^{sd}(0) < 0 < g_1^{c\mu}(\underline{z}) - g^{sd}(\underline{z}) = -g_2^{c\mu}(\underline{z}),$$

because  $g_1^{c\mu}(0) = 1 < g^{sd}(0)$  (shown above) and  $g_2^{c\mu}(\underline{z}) < 0$  (by Lemma 10.3.(a) since  $\underline{z}_1 < \lambda_1^{sd\infty}$ ).

It remains to prove the lower bound  $\mu^*(\underline{x})$  in (50). By Proposition 4, for any given  $\mu$ , strategic delay is optimal only if it is so for  $\Lambda_2 \approx 0$ . As  $\Lambda_2 \rightarrow 0$ , we have that  $g^{c\mu} \rightarrow 1$  on  $[0, \Lambda_1/2]$ , because  $\lambda_2^{sd}(\lambda_1) \rightarrow 0$  by (71), and  $\lambda_1^{sd\infty} \rightarrow \Lambda_1/2$  by (74), so that (72) and (64)-(65) imply:

$$\Pi_{\lambda_1}^{sd\infty}(\boldsymbol{\lambda}^{sd}(\lambda_1)) = \frac{\bar{v}_1}{c_1} \left(1 - 2\frac{\lambda_1}{\Lambda_1}\right) = \frac{\mu^*(\lambda_1)}{(\mu^*(\lambda_1) - \lambda_1)^2} = \bar{w}_2^{c\mu}(\boldsymbol{\lambda}^{sd}(\lambda_1), \mu^*(\lambda_1)) \text{ for } \lambda_1 \in [0, \Lambda_1/2].$$

It follows from Lemma 5.1 and 5.3 that strategic delay is optimal for  $\Lambda_2 \approx 0$  and  $\mu = \mu^*(x)$  if and only if  $g^{sd}(x) < 1$ . Since  $g^{sd}(0) > 1$ ,  $g^{sd}(\lambda_1^{sd\infty}) = 0$ , and  $g^{sd\prime} < 0$  by Lemma 9.2.(a), the equation  $g^{sd}(x) = 1$  has a unique solution. Setting  $\Pi_{\lambda_1}^{sd\infty}(\boldsymbol{\lambda}^{sd}(x)) = w_2^{sd}(\boldsymbol{\lambda}^{sd}(x)) = \frac{\bar{v}_1}{c_1}(\gamma - \delta x)$  yields

$$x = \frac{\Lambda_1 \bar{c}/\bar{v} - 1}{2 \bar{c} - 1.5} > 0 \text{ and } \mu^{sd} = \mu^*(x) = x + \frac{1 + \sqrt{1 + 4x \frac{\bar{v}_1}{c_1} (1 - 2x/\Lambda_1)}}{2 \frac{\bar{v}_1}{c_1} (1 - 2x/\Lambda_1)}.$$

That  $\mu^*(x) > \frac{c_1 - c_2}{\bar{v}_1 - \bar{v}_2}$  follows by noting that  $\frac{\bar{v}_1 - \bar{v}_2}{c_1 - c_2} > \frac{\bar{v}_1}{c_1} \left(1 - 2\frac{x}{\Lambda_1}\right) = \frac{\mu^*(x)}{(\mu^*(x) - x)^2} > \frac{1}{\mu^*(x)}$ . ■

**Proof of Proposition 7. Part 1.** These claims are proved in Lemma 7.3.

*Part 2.* Let  $v_i(\lambda_i) = \bar{v}_i(1 - \frac{\lambda_i}{\Lambda_i})$ ,  $i=1, 2$ , with  $\bar{\Lambda} > \bar{v}/(4\bar{c}(\bar{c} - 1))$  (Assumption A4) and  $\bar{v} > \bar{c}$ . By (71) we have  $\underline{\lambda}_1 = \Lambda_1(1 - \frac{\bar{c}}{\bar{v}})$ , so that  $R'_1(\underline{\lambda}_1) = \bar{v}_1(2\frac{\bar{c}}{\bar{v}} - 1) > 0 \Leftrightarrow \bar{v} < 2\bar{c}$ . By Part 1.(b) strategic delay is not optimal if  $\bar{v} \geq 2\bar{c}$ . In the rest of the proof  $\bar{c} < \bar{v} < 2\bar{c}$ .

By (71) we have  $\lambda_2^{sd}(\underline{\lambda}_1) = 0$  for  $\bar{v} > \bar{c}$ . Furthermore

$$\bar{w}_2^{c\mu}(\boldsymbol{\lambda}^{sd}(\underline{\lambda}_1), \mu^*(\underline{\lambda}_1)) = \frac{\mu^*(\underline{\lambda}_1)}{(\mu^*(\underline{\lambda}_1) - \underline{\lambda}_1)^2} = \Pi_{\lambda_1}^{sd\infty}(\boldsymbol{\lambda}^{sd}(\underline{\lambda}_1)) < \frac{v_1(\underline{\lambda}_1)}{c_1} = w_2^{sd}(\boldsymbol{\lambda}^{sd}(\underline{\lambda}_1)), \quad (87)$$

where the first equation holds by (64) since  $\lambda_2^{sd}(\underline{\lambda}_1) = 0$ , the second holds by (65), the inequality holds by (73), and the last equality holds by (76). By (87) and the definitions in (67) we have  $g^{c\mu}(\underline{\lambda}_1) = 1 > g^{sd}(\underline{\lambda}_1)$ . Let  $\bar{\Lambda}_2 \triangleq 2\Lambda_1(\bar{c} - \frac{1}{2} - \frac{\bar{c}}{\bar{v}})$ .

*Part 2.(a)* In this case  $\Lambda_2 > \bar{\Lambda}_2$ , since  $\bar{v} \leq \bar{c}/(\bar{c} - \frac{1}{2}) \Rightarrow \bar{\Lambda}_2 \leq 0$ . By Lemma 9.1,  $\Lambda_2 > \bar{\Lambda}_2 \Rightarrow \lambda_1^{sd\infty} > \bar{\lambda}_1^\infty$ , so that  $\Pi_{\lambda_1}^{sd\infty}(\boldsymbol{\lambda}^{sd}(\bar{\lambda}_1^\infty)) > w_2^{sd}(\boldsymbol{\lambda}^{sd}(\bar{\lambda}_1^\infty)) = 0$ . By (87), and because  $\Pi_{\lambda_1}^{sd\infty}(\boldsymbol{\lambda}^{sd}(\lambda_1))$  and  $w_2^{sd}(\boldsymbol{\lambda}^{sd}(\lambda_1))$  are linear, they cross once, at some  $x \in (\underline{\lambda}_1, \bar{\lambda}_1^\infty)$ , and  $g^{sd}(x) = 1$ . Since  $\Pi_{\lambda_1}^{sd\infty}(\boldsymbol{\lambda}^{sd}(x)) \geq w_2^{sd}(\boldsymbol{\lambda}^{sd}(x))$  for  $x \geq x$ , by Lemma 5.2 strategic delay is not optimal for  $\mu \geq \mu^*(x)$ .

By (87) we have  $g^{c\mu}(\underline{\lambda}_1) = 1 > g^{sd}(\underline{\lambda}_1)$ . Since  $\underline{x} \in (\underline{\lambda}_1, \overline{\lambda}_1^\infty)$  we have  $g^{c\mu}(\underline{x}) < 1$  by Lemma 10.1. It follows that  $g^{c\mu}(\underline{\lambda}_1) - g^{sd}(\underline{\lambda}_1) > 0 > g^{c\mu}(\underline{x}) - g^{sd}(\underline{x})$ . By continuity  $g^{c\mu} - g^{sd}$  has an odd number of roots in  $(\underline{\lambda}_1, \underline{x})$ . Let  $x_s$  be the smallest and  $x_l$  the largest root, i.e.,  $\underline{\lambda}_1 < x_s \leq x_l < \underline{x}$ , where  $g^{c\mu}(x) > g^{sd}(x)$  for  $x \in [\underline{\lambda}_1, x_s)$  and  $g^{c\mu}(x) \leq g^{sd}(x)$  for  $x \in [x_l, \underline{x}]$ . Since  $\mu^{*'} > 0$  on  $[0, \lambda_1^{sd\infty}]$  by (65), we have by Lemma 5.3 that strategic delay is optimal for  $\mu \in (\mu^*(\underline{\lambda}_1), \mu^*(x_s))$  and not optimal for  $\mu \geq \mu^*(x_l)$ , so that  $\mu^{sd} = \mu^*(\underline{\lambda}_1) < \mu^*(x_s) = \overline{\mu} \leq \underline{\mu} = \mu^*(x_l) < \mu^*(\underline{x})$ .

*Part 2.(b)* If  $\bar{c}/(\bar{c}-0.5) < \bar{v}$  then  $\overline{\Lambda}_2 > 0$ . For  $\Lambda_2 \leq \overline{\Lambda}_2$  we characterize the subset(s) of  $[\underline{\lambda}_1, \lambda_1^{sd\infty}]$  where  $g^{c\mu} - g^{sd} > 0$ . (By Lemma 5 this yields the capacity sets for which strategic delay is optimal.) We focus on  $g_1^{c\mu} - g^{sd}$ , because  $g^{c\mu} > g^{sd} \Leftrightarrow g_1^{c\mu} > g^{sd}$  on  $[\underline{\lambda}_1, \lambda_1^{sd\infty}]$ , which holds since  $g^{c\mu} = \max(0, g_1^{c\mu})$  and  $g^{sd} \geq 0$ . (That  $g^{c\mu} = \max(0, g_1^{c\mu})$  holds by Lemma 10:  $g^{c\mu} = \max(0, g_1^{c\mu} + g_2^{c\mu})$  by (81), and  $g_2^{c\mu} = 0$  on  $[0, \lambda_1^{sd\infty}]$  by Part 3.(b). That  $g^{sd} \geq 0$  holds by Lemma 9:  $\Lambda_2 \leq \overline{\Lambda}_2 \Rightarrow \lambda_1^{sd\infty} \leq \overline{\lambda}_1^\infty$  by Part 1, and  $\lambda_1^{sd\infty} \leq \overline{\lambda}_1^\infty \Rightarrow g^{sd} \geq 0$  on  $[\underline{\lambda}_1, \lambda_1^{sd\infty}]$  by Parts 2.(a)-(b).)

For fixed  $\Lambda_2 \leq \overline{\Lambda}_2$ ,  $g_1^{c\mu} - g^{sd}$  is strictly convex on  $[\underline{\lambda}_1, \lambda_1^{sd\infty}]$ : we have  $g^{sd\prime} \leq 0$  by Parts 1 and 2.(a)-(b) of Lemma 9, and  $g_1^{c\mu\prime} > 0$  by Lemma 10.2.(b). Furthermore we have

$$0 < g_1^{c\mu}(\underline{\lambda}_1) - g^{sd}(\underline{\lambda}_1) \leq g_1^{c\mu}(\lambda_1^{sd\infty}) - g^{sd}(\lambda_1^{sd\infty}) \leq 1, \quad (88)$$

since  $g_1^{c\mu}(\underline{\lambda}_1) = g_1^{c\mu}(\lambda_1^{sd\infty}) = 1$  by Lemma 10.2.(a),  $1 > g^{sd}(\underline{\lambda}_1)$  by (87), and  $g^{sd}(\underline{\lambda}_1) \geq g^{sd}(\lambda_1^{sd\infty}) \geq 0$  since  $g^{sd\prime} \leq 0$  by Lemma 9.2.(a)-(b).

Hence, for fixed  $\Lambda_2 \leq \overline{\Lambda}_2$ ,  $g_1^{c\mu} - g^{sd}$  has a unique minimum on  $[\underline{\lambda}_1, \lambda_1^{sd\infty}]$ . Making the dependence on  $\Lambda_2$  explicit, let  $x_{\min}(\Lambda_2) \triangleq \arg \min_{x \in [\underline{\lambda}_1, \lambda_1^{sd\infty}(\Lambda_2)]} \{g_1^{c\mu}(x, \Lambda_2) - g^{sd}(x, \Lambda_2)\}$ , where  $x_{\min}(\Lambda_2) < \lambda_1^{sd\infty}(\Lambda_2)$  by (88) and since  $g_1^{c\mu} - g^{sd}$  is strictly convex on  $[\underline{\lambda}_1, \lambda_1^{sd\infty}]$  for fixed  $\Lambda_2$ . By (79) and (82),  $g_1^{c\mu} - g^{sd}$  is continuous on  $\{(\lambda_1, \Lambda_2) : \Lambda_2 \in (0, \overline{\Lambda}_2], \lambda_1 \in [\underline{\lambda}_1, \lambda_1^{sd\infty}(\Lambda_2)]\}$ , so  $x_{\min}(\Lambda_2)$  and the value  $d(\Lambda_2) \triangleq g_1^{c\mu}(x_{\min}(\Lambda_2), \Lambda_2) - g^{sd}(x_{\min}(\Lambda_2), \Lambda_2)$  are continuous on  $(0, \overline{\Lambda}_2]$ .

Let  $\underline{\Lambda}_2 \triangleq \sup \{\Lambda_2 \in (0, \overline{\Lambda}_2] : d(\Lambda_2) > 0\}$ . Since  $d(\Lambda_2)$  is continuous, we have  $\underline{\Lambda}_2 > 0$  because  $d(\Lambda_2) > 0$  as  $\Lambda_2 \rightarrow 0$ ; this holds since  $g_1^{c\mu}(\underline{\lambda}_1) - g^{sd}(\underline{\lambda}_1) > 0$  by (88), and  $g_1^{c\mu\prime} - g^{sd\prime} > 0$  on  $[\underline{\lambda}_1, \lambda_1^{sd\infty}(\Lambda_2)]$  as  $\Lambda_2 \rightarrow 0$  ( $g^{sd\prime} < 0$  by Lemma 9.2.(a), and  $g_1^{c\mu\prime} \rightarrow 1$  as  $\Lambda_2 \rightarrow 0$  by Lemma 10.2.(b)).

Next, we have  $d(\Lambda_2) > 0$  if  $\Lambda_2 \in (0, \underline{\Lambda}_2)$ , and  $d(\Lambda_2) < 0$  if  $\Lambda_2 \in (\underline{\Lambda}_2, \overline{\Lambda}_2)$ : this follows because  $d(\Lambda_2) \leq 0 \Rightarrow d(\Lambda_2') < 0$  for  $\Lambda_2' > \Lambda_2$ , due to four properties. (i) the interval  $[\underline{\lambda}_1, \lambda_1^{sd\infty}(\Lambda_2)]$  increases in  $\Lambda_2$  by (74); (ii)  $g_1^{c\mu}(\underline{\lambda}_1) - g^{sd}(\underline{\lambda}_1) > 0$  by (88); (iii)  $g_1^{c\mu}(\underline{\lambda}_1) - g^{sd}(\underline{\lambda}_1)$  is constant in  $\Lambda_2$  by Lemma 9.3 and Lemma 10.2.(a); and (iv)  $g_1^{c\mu}(\lambda_1) - g^{sd}(\lambda_1)$  strictly decreases in  $\Lambda_2$  for fixed  $\lambda_1 > \underline{\lambda}_1$ , by Lemma 9.3 and Lemma 10.2.(c).

For  $\Lambda_2 \in (0, \overline{\Lambda}_2)$  we have  $\lambda_1^{sd\infty}(\Lambda_2) < \overline{\lambda}_1^\infty$  by Lemma 9.1, so strategic delay is optimal for  $\mu = \infty$  by Lemma 5.1. We consider in turn the cases,  $\Lambda_2 \in (0, \underline{\Lambda}_2)$  and  $\Lambda_2 \in (\underline{\Lambda}_2, \overline{\Lambda}_2)$ .

Fix  $\Lambda_2 \in (0, \underline{\Lambda}_2)$ . Then  $d(\Lambda_2) > 0$ , so  $g_1^{c\mu}(\lambda_1, \Lambda_2) - g^{sd}(\lambda_1, \Lambda_2) > 0$  for  $\lambda_1 \in [\underline{\lambda}_1, \lambda_1^{sd\infty}(\Lambda_2)]$ ; by Lemma 5.1 and 5.3 strategic delay is optimal for  $\mu \in (\mu^*(\underline{\lambda}_1), \infty)$ .

Fix  $\Lambda_2 \in (\underline{\Lambda}_2, \overline{\Lambda}_2)$ . Then  $d(\Lambda_2) < 0$ . Since  $(g_1^{c\mu} - g^{sd})(\lambda_1, \Lambda_2)$  is strictly convex, continuous in  $\lambda_1$ , and positive at  $\underline{\lambda}_1$  and  $\lambda_1^{sd\infty}(\Lambda_2)$  by (88), it has two roots  $x_s(\Lambda_2) < x_l(\Lambda_2)$  where  $\underline{\lambda}_1 < x_s(\Lambda_2) < x_l(\Lambda_2) < \lambda_1^{sd\infty}(\Lambda_2)$ . For  $\lambda_1 \in [\underline{\lambda}_1, \lambda_1^{sd\infty}(\Lambda_2)]$ ,  $g_1^{c\mu}(\lambda_1, \Lambda_2) - g^{sd}(\lambda_1, \Lambda_2) > 0$  if and only if  $\lambda_1 \in [\underline{\lambda}_1, x_s(\Lambda_2)) \cup (x_l(\Lambda_2), \lambda_1^{sd\infty}(\Lambda_2)]$ . Since  $\mu^{*'} > 0$  by (65), by Lemma 5.1 and 5.3 strategic delay is optimal iff  $\mu \in (\mu^*(\underline{\lambda}_1), \mu^*(x_s)) \cup (\mu^*(x_l), \infty]$ , and  $\mu^*(x_s) = \overline{\mu} < \underline{\mu} = \mu^*(x_l)$ . ■
